# Supplementary material
Source: PubMed Central journal article supplement (PMC6441330)
Supplement: NIHMS1019702-supplement-1-2.pdf [file NIHMS1019702-supplement-1-2.pdf]

**Supplemental Table 1**

Supplemental Table 1: Results of a 4-parameter sigmoidal curve fit of the payload release from single payload ARSs reported in Figure 3. The 95% confidence interval of the maximum payload release ( $R_{max}$ ), minimum payload release ( $R_{min}$ ), and the acoustic pressure at which half of maximum payload release was observed ( $P_{50}$ ) are listed in the format  $S [S_L, S_H]$ , where  $S$  is the average value,  $S_L$  is the lower bound value, and  $S_H$  is the upper bound value.

| <b>Time Point</b> | <b>Variable</b>   | <b>PFP-ARS (0.33% v/v)<br/>(Figure 3A)</b> | <b>PFHep-ARS (0.67% v/v)<br/>(Figure 3B)</b> | <b>PFH-ARS (0.67% v/v)<br/>(Figure 3C)</b> | <b>PFhep-ARS (0.33% v/v)<br/>(Figure 3D)</b> |
|-------------------|-------------------|--------------------------------------------|----------------------------------------------|--------------------------------------------|----------------------------------------------|
| <b>Day 2</b>      | <b>Bottom (%)</b> | 4.71 [N/A, 5.3]                            | 0.58 [0.45, 0.70]                            | 0.97 [0.34, 1.57]                          | 0.65 [0.06, 1.21]                            |
|                   | <b>Top (%)</b>    | 21.75 [8.72, N/A]                          | 3.23 [3.05, 3.49]                            | 7.20 [6.79, 7.68]                          | 13.90 [12.90, 15.41]                         |
|                   | <b>P50 (MPa)</b>  | 20.19 [2.88, 527.70]                       | 3.04 [2.81, 3.36]                            | 1.68 [1.49, 1.90]                          | 3.29 [3.02, 3.67]                            |
| <b>Day 3</b>      | <b>Bottom (%)</b> | 8.53 [N/A]                                 | 0.67 [0.47, 0.85]                            | 1.33 [0.66, 1.99]                          | 1.38 [0.70, 2.01]                            |
|                   | <b>Top (%)</b>    | 79.00 [N/A]                                | 4.94 [4.69, 5.27]                            | 10.33 [9.86, 10.88]                        | 17.15 [16.08, 18.66]                         |
|                   | <b>P50 (MPa)</b>  | 76.15 [N/A]                                | 2.93 [2.73, 3.17]                            | 1.70 [1.54, 1.87]                          | 3.23 [2.99, 3.54]                            |

**Supplemental Table 2**

Supplemental Table 2: Results of a 4-parameter sigmoidal curve fit of the payload release from dual payload ARSs reported in Figure 4. The 95% confidence interval of the maximum payload release ( $R_{max}$ ), minimum payload release ( $R_{min}$ ), and the acoustic pressure at which half of maximum payload release was observed ( $P_{50}$ ) are listed in the format  $S [S_L, S_H]$ , where  $S$  is the average value,  $S_L$  is the lower bound value, and  $S_H$  is the upper bound value.

| <b>Time Point</b> | <b>Variable</b>   | <b>PFP/PFHep-ARS<br/>(PFP, 0.33% v/v)<br/>(Figure 4A)</b> | <b>PFP/PFHep-ARS<br/>(PFHep, 0.67% v/v)<br/>(Figure 4B)</b> | <b>PFH/PFHep-ARS<br/>(PFH, 0.67% v/v)<br/>(Figure 4C)</b> | <b>PFH/PFHep-ARS (PFHep,<br/>0.33% v/v) (Figure 4D)</b> |
|-------------------|-------------------|-----------------------------------------------------------|-------------------------------------------------------------|-----------------------------------------------------------|---------------------------------------------------------|
| <b>Day 2</b>      | <b>Bottom (%)</b> | 2.36 [2.12, 2.56]                                         | 0.98 [0.75, 1.17]                                           | 0.74 [0.15, 1.27]                                         | 0.58 [0.32, 0.77]                                       |
|                   | <b>Top (%)</b>    | 7.39 [5.04, N/A]                                          | 4.69 [4.12, 6.20]                                           | 6.58 [6.00, 7.75]                                         | 1.64 [1.45, 2.85]                                       |
|                   | <b>P50 (MPa)</b>  | 7.78 [3.93, 271.40]                                       | 3.61 [2.99, 5.44]                                           | 3.21 [2.83, 3.78]                                         | 3.12 [2.39, 7.40]                                       |
| <b>Day 3</b>      | <b>Bottom (%)</b> | 3.32 [3.02, 3.59]                                         | 1.29 [1.01, 1.54]                                           | 1.18 [0.56, 1.75]                                         | 0.60 [0.28, 0.88]                                       |
|                   | <b>Top (%)</b>    | 8.65 [7.34, 16.59]                                        | 7.12 [6.38, 8.66]                                           | 9.43 [8.82, 10.40]                                        | 3.19 [2.85, 3.98]                                       |
|                   | <b>P50 (MPa)</b>  | 4.66 [3.34, 14.40]                                        | 3.62 [3.10, 4.75]                                           | 3.12 [2.84, 3.46]                                         | 3.98 [3.50, 4.73]                                       |
